## **Effects of mutations in pigeon *Mclr* implicate an expanded plumage color patterning regulatory network**

Shreyas Krishnan\*, Richard L. Cryberg

\*Department of Biology, University of Texas at Arlington, Arlington, Texas, 76019

\*Corresponding author: Department of Biology, University of Texas at Arlington, Arlington, Texas, 76019. E-mail: [shreyas.krishnan@gmail.com](mailto:shreyas.krishnan@gmail.com)

Short running title: *Mclr* mutations in pigeons

**KEYWORDS** *Mclr*; pigeon genetics; pigmentation genetics; reverse genomics

Corresponding author:

Shreyas Krishnan

Department of Biology

University of Texas at Arlington

501 S. Nedderman Dr.

Arlington, Texas, 76019

shreyas.krishnan@gmail.com

## Abstract

Studies in mammals have shown that the Melanocortin 1 receptor occupies a pivotal role as a nexus for integrating paracrine and autocrine signals to regulate pigment production and type-switching between pheomelanin (red/yellow) and eumelanin (black/brown) pigment synthesis in melanocytes. Inactivating mutations in the *Mclr* gene are responsible for recessive pheomelanic reddening traits in several species, while mutations that increase activity cause dominant eumelanic darkening traits in mammals and birds. Previous efforts to associate *Mclr* coding variants with color variation in pigeons (*Columba livia*) have yielded conflicting results. Applying a reverse genomic approach, we discovered a novel 500 base pair frameshifting deletion in pigeon *Mclr* that likely inactivates the single-exon gene. Segregation analysis revealed complete cosegregation (LOD = 12.2) with *smoky* (symbol *sy*), a recessive pigmentation trait reported in these pages by Willard F. Hollander 80 years ago. We coupled these findings with breeding tests to determine that *Dirty* (*V*), a dominant darkening trait, is allelic to *sy*, and identified two independent *V* alleles, one of which is associated with melanic morphs of two other bird species. In contrast to observations that *Mclr* inactivation results in uniform pheomelanic pelage in mammals, its loss in otherwise wild-type pigeons occurs without apparent pheomelanism, instead increasing plumage eumelanism while leaving black bar pattern elements of the tail and wing largely intact. These findings require reconsideration of *Mclr*'s presumed role in pigment type-switching in birds, and suggest the existence of *Mclr*-independent pathways for eumelanic pigmentation pattern regulation unknown in mammals.

## Introduction

Coding sequence variation in the *Melanocortin 1 receptor* (*Mclr*) gene has been found to be responsible for pigmentation traits in dozens of vertebrate species, primarily mammals and birds (Cieslak *et al.* 2011; Roulin and Ducrest 2013). The *Mclr* protein is a seven transmembrane G protein-coupled receptor that occupies a key position in the melanogenesis regulatory pathway, directing melanin pigment synthesis through a cascade of downstream effectors via modulation of the second messenger cyclic AMP (cAMP) in response to extracellular ligands (Barsh 2006; Walker and Gunn 2010; Yang 2011). In mammals, the phenotypes of *Mclr* variants may be described as falling along a spectrum of (eu)melanic dark morphs to pheomelanic red/yellow morphs. Mammalian melanic *Mclr* alleles are dominant hypermorphs, typically single amino acid substitutions or short in-frame deletions involving the first extracellular loop or adjacent transmembrane spans that result in a constitutively active or hyperactive mutant protein, while pheomelanic alleles are recessive hypomorphs or complete loss-of-function (null) alleles; however, some null alleles result in near-white coats in certain contexts (Robbins *et al.* 1993; Klungland *et al.* 1995; Kijas *et al.* 1998; Våge *et al.* 1999; Schiöth *et al.* 1999; Newton *et al.* 2000; Everts *et al.* 2000; Ritland *et al.* 2001; Schmutz *et al.* 2002; Eizirik *et al.* 2003; Nachman *et al.* 2003; Fontanesi *et al.* 2010; Dürig *et al.* 2018). Either constitutively active or null *Mclr* variants eliminate wild-type coat color patterns produced by eumelanin-pheomelanin pigment type-switching, typically resulting in solid black/brown or red/yellow coats, highlighting *Mclr*'s pivotal role in the regulation of melanin pigment color patterns (Robbins *et al.* 1993; Fang *et al.* 2009; Kaelin and Barsh 2013). Among birds, color polymorphisms have been associated with over two dozen *Mclr* variants in several wild and domestic species, but curiously, nearly all known avian *Mclr* variants characterized thus far are

darkeners; while a few variants that lighten portions of the wild-type plumage have been described, no solid red/yellow pheomelanin traits like those seen for null alleles in mammals are known to result from *Mclr* variation in birds (Takeuchi *et al.* 1998; Theron *et al.* 2001; Kerje *et al.* 2003; Mundy *et al.* 2004; Doucet *et al.* 2004; Nadeau *et al.* 2006; Baião *et al.* 2007; Uy *et al.* 2009; Vidal *et al.* 2010a; b; Gangoso *et al.* 2011; Cibois *et al.* 2012; Johnson *et al.* 2012; Yu *et al.* 2013; Guernsey *et al.* 2013; Schmitt 2015; San-Jose *et al.* 2017; Janssen and Mundy 2017; Araguas *et al.* 2018; Kageyama *et al.* 2018).

Domestic pigeons harbor a vast diversity of pigmentary variation distributed among hundreds of breeds and varieties (Levi 1965). Although many genetic factors and interactions have yet to be rigorously dissected, classical genetic work by early pioneers, including Thomas H. Morgan and Willard F. Hollander, and continued efforts by hobbyists and amateur geneticists have resulted in the characterization of modes of inheritance and genetic interactions of dozens of Mendelian traits affecting plumage pigmentation and morphology (Morgan 1918; Hollander 1938, 1983; Sell 2012). These foundational contributions have enabled the application of modern genetic tools to propel advances in understanding processes underlying the unrivaled variation in melanin-based colors and patterns cultivated by fanciers over millennia (Levi 1963; Domyan *et al.* 2014). This kaleidoscope of pigeon color diversity also presents challenges due to the potential for abundant genetic heterogeneity and epistasis to wither associations for causative variants into a background of spurious signals generated by intense selection in small, structured sub-populations. Here we coupled reverse genomics with a family-based approach to avoid these pitfalls, mapping a novel frameshifting deletion in *Mclr* to *smoky*, an autosomal recessive pigmentation trait with mild plumage darkening effects. We then leveraged this finding to establish allelism with *Dirty*, a dominant trait with grossly similar effects on plumage

pigmentation, identifying two independent missense substitutions, Val85Met and Ser174Gly. Although seen in other studies of pigeon *Mc1r*, the effects of these widespread substitutions eluded previous researchers despite the former's association with dark morphs in two other bird species (Mundy *et al.* 2004; Baião *et al.* 2007; Derelle *et al.* 2013; Guernsey *et al.* 2013). The lack of apparent pheomelanism and retention of major eumelanic pattern features in pigeons homozygous for the presumptive loss-of-function deletion allele call for a re-examination of assumptions regarding *Mc1r*'s role in avian pigmentation.

## **Materials and Methods**

### ***Animals and trait diagnosis***

Pedigreed families were produced in our laboratory colony over a period of several years, with mated pairs housed in individual breeding pens. Feral pigeons were trapped in Tarrant County, Texas and humanely killed by CO<sub>2</sub> asphyxiation prior to phenotypic assessment and tissue sampling. All animal procedures were conducted in accordance with protocols approved by the Institutional Animal Care and Use Committee of the University of Texas at Arlington (protocol numbers A09.009 and A14.004).

Phenotypic assessments were made blind to genotypes independently by at least two experienced evaluators under standardized light conditions. Evaluations were supported by observations recorded shortly after hatching, when the diagnostic value of certain phenotypic features (bill and skin pigmentation) are maximal. Individuals that could not be diagnosed due to epistatic piebald traits were excluded.

## ***Samples***

Samples for genomic DNA isolation consisted either of whole blood obtained from live animals, or liver or skeletal muscle tissues collected from carcasses or late-stage embryos. For live animals, approximately 2 mL of blood was obtained by venipuncture and collected into EDTA vacuum collection vials. Unhatched fertile (determined by candling) eggs were collected 22 days after laying, and embryonic tissues were dissected for DNA extraction. Cells pelleted from whole blood or homogenized solid tissue samples were lysed by incubation with 20 µg/ml Proteinase K (reagents obtained from Sigma-Aldrich, St. Louis, Missouri, unless otherwise indicated) in 500 µL PK buffer (50 mM Tris-HCl, 20 mM EDTA, 100 mM NaCl, 1% SDS) at 55°C for 3–6 hours, and genomic DNA was extracted by standard phenol:chloroform:isoamyl alcohol extraction method (Sambrook and Russell 2006).

## ***Detection of variants from whole genome shotgun sequence libraries***

Available sequence reads from whole genome shotgun sequence libraries from 40 pigeons of diverse breeds/varieties (described in Shapiro *et al.* 2013) were obtained from the Sequence Read Archive (SRA, BioProject accession PRJNA167554) and used to identify sequence variation within *Mc1r*. The SRA format was converted into split FASTQ files for mapping using the fastq-dump tool included in the SRAtoolkit provided by NCBI (<https://github.com/ncbi/sra-tools/wiki/Downloads>). These FASTQ formatted reads were mapped to the Cliv1.0 pigeon reference genome using the Novoalign short-read mapping software, version 2.08.02 (Novocraft Technologies, Selangor, Malaysia) with default parameters. Single nucleotide variants and short insertions and deletions were identified using the mpileup feature of SAMtools (Li *et al.* 2009). Simple sequence repeat length variations were characterized using the methods of Fondon *et al.*

(2012), for repeats identified by Tandem Repeat Finder v2.30 (Benson 1999) with parameters “2 5 5 80 10 14 5.” Larger insertions, deletions, and other structural variation within 50 kilobases of *Mc1r* were identified by anomalous inferred insert size, mate-pair orientation, or mapped read depth retrieved using the mpileup feature of SAMtools (Li *et al.* 2009).

### ***Genotyping and DNA sequencing***

Genotyping and sequencing primers were designed using Primer3 (Rozen and Skaletsky 2000). Deletion genotyping was performed using polymerase chain reaction (PCR): 1U *Taq* DNA polymerase (United States Biochemical, Cleveland, Ohio), 20 pmol of each primer (forward: CTTGACACTACGTGCTGTGG; reverse: ACATGCTGCCGAGGTGGT), 5  $\mu$ L FailSafe 2 $\times$  PCR premix G (EpiCentre, Madison, Wisconsin), approximately 25 ng genomic DNA template, and ultrapure deionized water to a final reaction volume of 10  $\mu$ L. Genotyping thermal cycling conditions were an initial melt at 96°C for 3 min; followed by 30 cycles of 30 s each at 96°C, 61.7°C, and 72°C; with a 6 min final extension at 72°C. Sanger sequencing of the *Mc1r* coding sequence was performed in overlapping segments on PCR products (forward/reverse primer pairs GTGCCCTGGAGCTGAGGT / AGAGGAGGATGGCATTGTTG and GCGCTACACAGCATCAT / CCATTATCGGTGTCCCCTG) amplified as above. Amplified products were treated with shrimp alkaline phosphatase and exonuclease I (both from United States Biochemical), and sequenced in both directions on an AB 3730xl capillary sequencer using BigDye 4.0 dye-terminator chemistry (Applied Biosystems, Foster City, California) by the UT Arlington Genomics Core. Electropherograms were visually inspected using BioEdit (Hall 1999).



### ***Statistical analysis***

The significance of cosegregation and departures from Mendelian expectations were computed as exact binomial probabilities. The significance of departure of genotypic proportions from Hardy-Weinberg expectations in the feral pigeon sample was computed using Hardy-Weinberg exact test (Wigginton *et al.* 2005). Association of the *McIr* deletion allele with the smoky phenotype in feral pigeons was computed using Fisher's exact test under a recessive model.

### ***Data availability***

The authors state that all data necessary for confirming the conclusions presented in the article are represented fully within the article or are available in a public data repository. Whole genome shotgun sequence libraries are available from the NCBI Sequence Read Archive under BioProject accession PRJNA167554 (Shapiro *et al.* 2013).

### **Results**

Conducted as part of a genomic survey for variants of potential functional significance for pigimentary variation, an examination of available whole genome shotgun sequence (WGS) libraries for 40 domestic pigeons representing diverse breeds (Shapiro *et al.* 2013) revealed four *McIr* missense substitutions (Val85Met, Asp115Asn, Ser174Gly, and Arg217Cys), all of which have been reported previously (see Discussion). Unexpectedly, a stretch of approximately 500 bp with reduced mapped depth suggestive of a previously unknown intragenic deletion was observed within the *McIr* coding region for WGS libraries from several breeds (English carrier, English pouter, Egyptian swift, Indian fantail, laughter, Scandaroon, Spanish barb, and Birmingham, Oriental and parlor rollers), a surprising development given the multiple previous

studies of pigeon *Mc1r* coding variation. To identify individuals possessing the deletion that could be used to experimentally confirm its molecular nature and inheritance, genomic DNAs from six individuals from our laboratory breeding colony selected based on the above breed distribution were screened by PCR using primers flanking the putative deletion. These screens revealed three individuals to be heterozygous for the deletion, including both members of a mated pair, and testing the offspring of the heterozygous parents confirmed normal Mendelian segregation (Figure 1A), supporting the conclusion that the deletion affects the endogenous *Mc1r* locus, and not a pseudogenized duplicate copy (Gross *et al.* 2017). Sequencing across the breakpoint confirmed a deletion of exactly 500 bp, corresponding to positions 5700250-5700749 of scaffold 123 (NW\_004973333.1:g.5700250\_5700749del), including a two-nucleotide site of microhomology indicative of a microhomology-mediated end-joining double-strand break repair process (Lieber *et al.* 2003). The deletion removes two bases of the fourth codon through codon 170, disrupting the reading frame and resulting in the predicted loss of all but the first three residues of the Mc1r protein (c.11\_510del, p.Leu4HisfsTer100; hereafter *Mc1r*<sup>Δ500fs</sup>; Figure 1B).

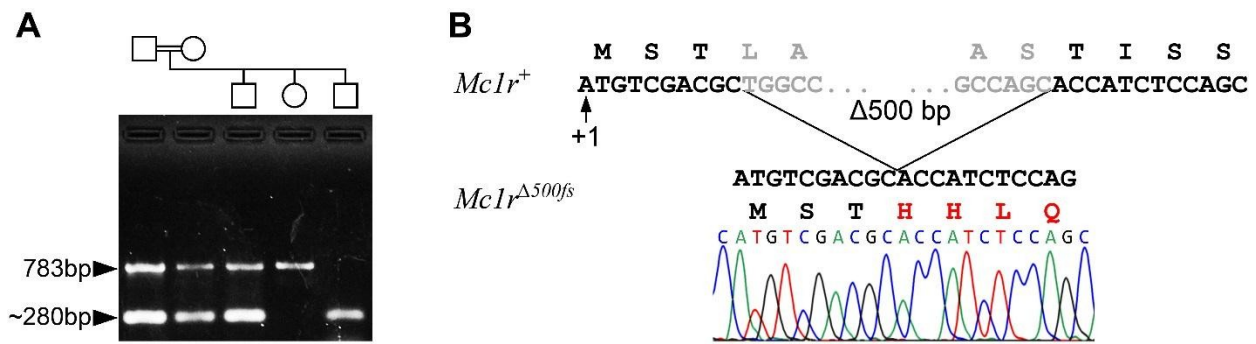

**Figure 1** A. novel frameshifting deletion in *Mc1r* segregates in domestic pigeons. A. Screening by PCR identified apparent heterozygotes (left two lanes) for a putative ~0.5 kb deletion in pigeon *Mc1r*. The presence of all three genotypes among the offspring (right three lanes) of heterozygous parents demonstrates normal Mendelian segregation. B. Sanger sequencing of a homozygote revealed that the 500 bp deletion begins in the fourth codon, removes over half of the coding sequence, and disrupts the reading frame.

With the molecular nature of the deletion in pigeon *Mc1r* confirmed, we set about the reverse genetic process of attempting to identify any phenotypic effects. Activating mutations in *Mc1r* cause dominant melanic phenotypes in mammals and birds, while loss-of-function mutations produce recessive red/yellow coats in mammals, and are expected to have the same effects on plumage (Robbins *et al.* 1993; Klunland *et al.* 1995; Våge *et al.* 1997, 1999; Kerje *et al.* 2003; Ling *et al.* 2003). Pigeons possess one such trait, *recessive red* (symbol *e*), which would be an ideal candidate trait for the *Mc1r*<sup>Δ500fs</sup> deletion had we not previously determined it to be caused by *cis*-regulatory mutations in *Sox10*, a downstream target of *Mc1r* signaling (Domyan *et al.* 2014). As there was no apparent pheomelanism in genotyped heterozygotes, other major pigeon reddening traits, including *kite*, *archangel bronze 1*, and *mahogany*, could be

excluded on the basis of their modes of inheritance (Sell 2012). In the absence of obvious large-effect candidate traits, we adopted a family-based approach in order to limit the confounding impacts of epistatic factors and maximize sensitivity for traits of modest effect. Screening the founding pairs of pedigreed families from our laboratory colony identified two families segregating for the *Mc1r* <sup>$\Delta 500\text{fs}$</sup>  deletion, including a 14-member sibship from heterozygous parents (Family1, shown in Fig 1A), and a large three-generation filial pedigree derived from founders homozygous for alternate alleles (Family2). Both families were noted to segregate for *smoky*, a plumage darkening trait.

Characterized by W. F. Hollander in his doctoral dissertation research (1937, 1938), *smoky* (symbol *sy*; autosomal recessive) slightly darkens the light blue background of wild-type plumage, as well as the albescent (whitish) underwing and rump patch, creating an overall darkening impression very similar to that of the autosomal dominant *Dirty* (symbol *V*; Bol 1926) trait (Figure 2). Unlike *V*, which darkens essentially all pigmented regions, *sy* reduces the richness and definition of the dark wing bars, whitens the bases of pigmented feathers, slightly accentuates the blue tip edges of the rectrices distal to the black tail band, and reduces or eliminates the albescent strip on the lateral rectrices, causing these to become pigmented like other tail feathers (Bol 1926; Hollander 1937, 1938). Less noticeable in adults is the tendency of *sy* to reduce pigment intensity of the claws, beak, and skin, areas for which *V* has the opposite effect. The considerable variability in the expression of both of these traits and the abundance of epistatic interactions with other factors means that they are not unerringly recognizable across all genetic backgrounds; with experience, however, *smoky* can be reliably identified in many contexts, particularly when several individuals from the same stock are available for comparison (Hollander 1938; Sell 2012).

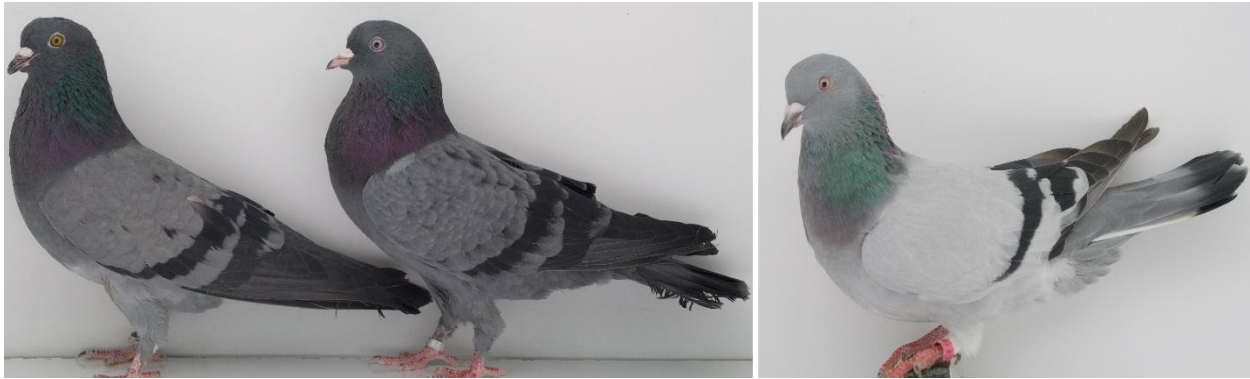

**Figure 2** Typical effects of *Dirty* and *smoky* on plumage color are grossly similar. Both *Dirty* ( $V$ , left) and *smoky* ( $sy$ , center) darken plumage areas that are light blue-gray in wild-type (right), as well as the albescent underwing, producing overtly similar effects; however, unlike  $V$ , which darkens nearly the entire plumage, along with the skin, beak, and claws,  $sy$  lightens the integument, reduces definition of the dark wing shield pattern, and eliminates the whitish markings (albescent strip) on the lateral tail feathers (obscured by wing tip in the dirty individual). The increased width of the wing bars and black ticking on the wing shields of these *Dirty* and *smoky* birds relative to wild-type are due to variation at the *Checker* locus, which interacts additively with either  $V$  or  $sy$  (Hollander 1938).

In Family1, three smoky individuals were among 14 siblings obtained from a pair of non-*smoky* founder parents, identifying the founders as  $sy$  heterozygotes. In Family2, eight obligate carrier  $F_1$  offspring of a *smoky* male and non-*smoky* female  $P_0$  founders were mated *inter se* to produce 42  $F_2$ , including six *smoky* individuals. *Mc1r* genotypes of the founders of both families were consistent with  $sy$  locus genotypes, so we tested for cosegregation of the *Mc1r* <sup>$\Delta 500fs$</sup>

deletion with *sy*. Independent phenotype assessments for *smoky* were made blind to genotypes for all 65 descendants of these founders by two experienced observers (S.K. & J.W.F.). Phenotype calls were fully concordant between observers, and genotypes exhibited complete cosegregation between *Mcl1r<sup>Δ500fs</sup>* and *sy*: all *smoky* individuals were homozygous for the deletion, while all other individuals had at least one copy of the full-length allele, and obligate carriers were heterozygous (Figure 3). The binomial probabilities of obtaining the observed complete cosegregation by chance, conditioned on founder genotypes, are  $p = 7.3 \times 10^{-5}$  for Family1 and  $p = 7.8 \times 10^{-9}$  for Family2, for a combined significance of  $p = 5.7 \times 10^{-13}$  (LOD = 12.2).

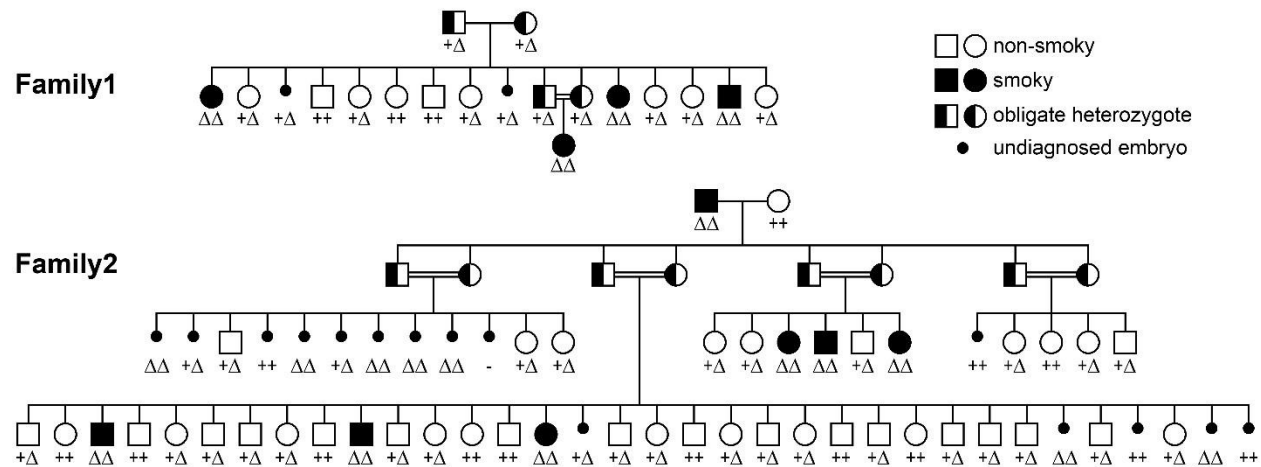

**Figure 3** The *Mcl1r<sup>Δ500fs</sup>* allele cosegregates with *sy*. Segregation analysis in two unrelated families revealed complete cosegregation ( $p_{\text{Family1}} = 7.3 \times 10^{-5}$ ;  $p_{\text{Family2}} = 7.8 \times 10^{-9}$ ;  $p_{\text{combined}} = 5.7 \times 10^{-13}$ , LOD = 12.2). Embryos that failed to hatch are shown with their corresponding genotypes except for one that was unavailable (indicated by “-”). Unhatched embryos were not included in the cosegregation analysis.

Although Hollander's original breeding data showed no evidence of reduced survival of *smoky* offspring (Hollander 1938), *smoky* appeared to be slightly under-represented in our mapping families. Only nine smoky offspring were obtained out of a total of 49 squabs hatched from heterozygote matings, but this under-representation was not significant ( $p = 0.18$ ; binomial). While not included in the cosegregation analysis due to the uncertainty of phenotypic diagnosis of embryos, we also genotyped 16 F<sub>2</sub> embryos that failed to hatch (Figure 3, small circles), seven of which were found to be homozygous for the deletion. The excess of *Mc1r*<sup>Δ500fs</sup> homozygotes among unhatched embryos was also short of our chosen 0.05 significance threshold ( $p = 0.080$ ), as was the excess of failures to hatch for deletion homozygotes in a combined analysis ( $p = 0.074$ ). They were, however, substantial enough to motivate additional study.

A useful feature of pigeons as a model system is the availability of feral populations to provide insights regarding the fitness effects of variants of interest in natural populations of free-living animals (Johnston and Janiga 1995). Reduced early viability of *smoky* individuals would be expected to produce a deficiency of *sy* homozygotes relative to Hardy-Weinberg expectations (HWE) among feral adults. The high frequency of *sy* among domestic pigeons, the progenitors of feral populations, and Hollander's observations of *smoky* individuals in feral flocks suggested that *sy* might be of sufficiently high frequency in feral populations that significant HWE departures could be detectable with smaller sample sizes (Hollander 1983). Screening 39 feral pigeons of unknown relationships for the *Mc1r*<sup>Δ500fs</sup> deletion identified four deletion homozygotes, three heterozygotes, and 32 homozygotes for full-length alleles, a significant excess of homozygotes over HWE ( $p = 5.9 \times 10^{-4}$ ; Hardy-Weinberg exact test). Although these

data were not intended for genetic association testing purposes due to concerns about the reliability of trait diagnosis in pigeons of unknown ancestry, it is noteworthy that the four deletion homozygotes were the only *smoky* birds in the feral sample ( $p = 1.22 \times 10^{-5}$ ; Fisher exact).

*Smoky* occurs in many pigeon breeds, and the representation of breeds possessing the *McIr* <sup>$\Delta 500fs$</sup>  deletion among the pigeon whole genome shotgun sequencing libraries is consistent with what is known about the breed distribution of *sy*. Breeds possessing the deletion include very old, morphologically disparate breeds with distant geographic origins, implying an ancient origin for the *sy* mutation (Levi 1963). A few breeds are reported to be fixed for *sy*, including carriers, barbs, magpies, and Egyptian swifts (Hollander 1938; Estabrook 2013). Three of these breeds were represented among the whole genome shotgun libraries, and constituted three of only six libraries that were homozygous for the *McIr* <sup>$\Delta 500fs$</sup>  allele: English carrier, Spanish barb, and Egyptian swift ( $p = 2.02 \times 10^{-3}$ ; binomial).

Interestingly, the autosomal dominant *Dirty* (*V*) darkening trait was also segregating in both Family1 and Family2, exhibiting a peculiar inheritance pattern in which every individual expressed either *smoky* or *Dirty*. The probability of such an inheritance pattern resulting from random segregation of unlinked loci by chance is sufficiently small ( $p < 10^{-12}$ ) that it may be rejected, leaving two plausible explanations: either 1.) both families are fixed for *V* and epistasis of homozygous *sy* over *V* prevents the expression of *Dirty* in *smoky* birds (i.e. a two-locus model with epistasis); or 2.) *V* and *sy* are alternative alleles of the same locus (or tightly linked). Formally, the converse of model 1 (i.e. *V* is epistatic to *sy*, and it is *V* rather than *sy* that maps to *McIr*) could in theory also produce the observed inheritance pattern; however, the independent support for the association of *McIr* <sup>$\Delta 500fs$</sup>  with *sy* seen in the feral sample and the breed



distribution data exclude this model. Although widely presumed to be separate loci by hobbyists, neither allelism nor epistasis between *sy* and *V* has been investigated, but their phenotypic similarities and the abundance of melanic variants in other species for which *Mc1r* has either been confirmed or excluded render either scenario plausible (MacDougall-Shackleton *et al.* 2003; Cheviron *et al.* 2006; Wlasiuk and Nachman 2007; Roulin and Ducrest 2013).

The availability of *smoky* F<sub>2</sub> from Family2 offered a means to discriminate between the allelism and epistasis models using breeding tests. Under the two-locus model, all family members are homozygous for *V*, while under an allelism model *V* is excluded from the genetic constitution of *sy/sy* homozygotes. We performed testcrosses to distinguish between these scenarios. We mated two *smoky* F<sub>2</sub> from Family2 to unrelated non-*Dirty* individuals that were (by happenstance) heterozygous for the *Mc1r*<sup>Δ500fs</sup> deletion. Under the two-locus model, all offspring from such matings (*sy/sy*; *V/V* × *Sy*<sup>+</sup>/*sy*; *v*<sup>+</sup>/*v*<sup>+</sup>) will either be *smoky* or *Dirty*, but never wild-type. Alternatively, if the allelism model is correct, these *smoky* F<sub>2</sub> cannot harbor *V*, and all offspring of these *sy/sy* × *Sy*<sup>+</sup>/*sy* matings will be either *smoky* or wild-type, but never *Dirty*. These test crosses produced a total of three *smoky* and six wild-type offspring, and no *Dirty*, establishing *sy* and *V* as alternative alleles of the same locus.

Melanic *Mc1r* variants identified in other species are most frequently single amino acid substitutions, or less commonly short in-frame deletions (Roulin and Ducrest 2013). In order to identify any coding sequence changes associated with *V*, we sequenced the entire *Mc1r* coding regions of the full-length alleles segregating in opposition to the deletion allele in both of the mapping families. Sequencing homozygous non-deletion F<sub>1</sub> of Family1 showed that its founder parents were both heterozygous for the previously observed Gly174 variant (c.520A>G, p.Ser174Gly; *Mc1r*<sup>Ser174Gly</sup>) opposite the *Mc1r*<sup>Δ500fs</sup> deletion. The *V/V* founder of Family2 was

homozygous for the Met85 allele (c.253G>A, p.Val85Met; *Mc1r*<sup>Val85Met</sup>). Both of these variants occur in multiple pigeon WGS libraries (data not shown), and have been reported previously in other studies, as discussed below (Derelle *et al.* 2013; Shapiro *et al.* 2013; Guernsey *et al.* 2013; Ran *et al.* 2016).

## Discussion

While the array of color diversity amassed in myriad varieties of domestic pigeons offers great promise as a powerful resource for the genetic dissection of pigmentation regulation, the complexity of epistatic interactions and potential for genetic heterogeneity also present challenges (Domyan *et al.* 2014). We have combined reverse genomic and classical genetic approaches to isolate constituent Mendelian components of genetically complex pigmentation variation within families in order to avoid the pitfalls that have hampered previous efforts to link variation in pigeon *Mc1r* to pigmentation traits, uncovering insights that have the potential to alter our understanding of avian pigment pattern regulation. Our approach of working within well-characterized families served to bound the genetic complexity and enabled reliable genetic inference of similar and variably expressed traits, something not feasible for the diverse samples used for genetic association. After mapping the *Mc1r*<sup>Δ500Es</sup> deletion mined from pigeon WGS sequences to *sy* by cosegregation, we leveraged the fortuitous presence of *V* in the mapping families to establish *V-sy* allelism, and identified two independent *V* alleles.

### *Previous studies and breeder lore*

The conclusions of the various studies that have sought to identify associations between *Mc1r* coding variants and pigeon color variation range from inconclusive (Ran *et al.* 2016), to

excluding association (Miller and Shapiro 2011; Derelle *et al.* 2013), to marginally significant association of the Met85 allele with pheomelanism (Guernsey *et al.* 2013), to suggestive of association of the Gly174 allele with eumelanism (D. Smith, personal communication). The contradictions among the various studies are less substantial than some of their titles suggest, and we believe are largely attributable to methodological differences. The published studies either classified phenotypes by categorical appearance (e.g. pheomelanic vs. eumelanic), rather than on the basis of inferred genetic constitution for recognized traits, or considered only traits of large effect. The phenotypes of *Dirty* and *smoky* are sufficiently modest and background-dependent that under such schemes the classification of affected birds would be dominated by any large-effect traits with which they tended to co-occur. We suspect such a correlation is behind the curious findings by Guernsey *et al.* (2013) of a marginally significant association between pheomelanism and Met85, a substitution perfectly associated with the opposite effect (eumelanism) in red-footed boobies and lesser snow geese (Mundy *et al.* 2004; Baião *et al.* 2007). Breeders of red or bronze pigeon varieties routinely select for *V* and other darkeners as they are known to improve the appearance of red pigeons (Hollander 1937; Mangile 1973; Sell 2012). Modest non-random associations resulting from this selection are therefore not unexpected between *V* alleles and large-effect reddening traits, particularly in samples with substantial contributions from pigeons bred for exhibition. Because the robustness of their detected association ( $p = 0.03$ , uncorrected) contrasted so markedly with the much stronger associations typical of causative *Mc1r* variants, Guernsey *et al.* speculated that Met85 likely had only subtle or background-dependent effects that would require controlled crosses to resolve. Our results bear out these inferences, and our determination that Met85 is a major *V* allele brings new clarity to their results, returning pigeon pigmentation genetics to harmony with other birds

(Mundy *et al.* 2004; Baião *et al.* 2007). The existence of the same substitution with similar effects in wild species validates pigeons' utility as a model for understanding the genetic basis of variation in natural populations, and the surprising mildness of the *smoky* phenotype may help explain the paucity of *Mclr* hypomorphs and null mutations identified in other birds.

The unpublished work of Dan Smith and colleagues at Goshen College differs from the other studies in that birds were scored for all known Mendelian factors, and the sample was restricted to a small number of breeds to limit potentially confounding genetic heterogeneity (D. Smith, personal communication). Such nuanced approaches to phenotypic classification offer clear advantages, but the complexity of pigeon pigimentary variation constrains their application in practice, as few traits are unerringly recognizable across most genetic contexts. Accordingly, epistatic traits precluded confident assessment of *Dirty* status for all but six individuals (4  $V/-$ , 2  $v^+/v^+$ ), leaving their sample underpowered; however, the observed complete association of the Gly174 allele with  $V$  in these individuals, though short of significance, is supportive of our results (D. Smith, personal communication).

Breeders commonly credit the combined effects of *smoky* and *Dirty* for the quality of an individual solid-colored pigeon, a proposition seemingly incompatible with *sy* being both allelic and recessive to  $V$ . Such claims appear to be founded on conjecture divined from the traits' separate effects in solid-colored backgrounds, rather than on rigorous genetic dissection; however, some may be more-or-less valid and yet still reconciled with our findings in either of two ways: First, breeders' selection for intense coloration by design accumulates minor uncharacterized darkening traits, and may do so in a manner cumulatively indistinguishable from  $V$ , thus permitting concurrent homozygosity for *sy*. Second, like many nominally recessive traits, *sy* is not invariably fully recessive, and a tendency toward dominance becomes sufficiently

pronounced in some solid-colored backgrounds that Hollander suggested breeding tests may be necessary to confidently discriminate *sy* homozygotes from heterozygotes in such backgrounds (Hollander 1938). Aesthetic superiority of *V/sy* heterozygotes over either homozygote could also explain the difficulties cultivators of some solid-colored varieties have encountered attempting to obtain intense, uniform coloration that will breed true (Sell 2012).

### ***Mc1r's role as master regulator***

The *Mc1r*<sup>Δ500fs</sup> deletion excises over half of *Mc1r*'s 313 codons, including those encoding multiple transmembrane helices essential for G protein-coupled receptor stability and function (Rosenbaum *et al.* 2009). It also disrupts the reading frame, and with no potential site for termination-reinitiation in the remainder of the single-exon transcript, results in the predicted elimination of all but the first three residues of the Mc1r protein. We conclude that the *Mc1r*<sup>Δ500fs</sup> allele results in the complete loss of Mc1r function.

Nonsense and frameshift loss-of-function alleles are abundantly represented among pheomelanic *Mc1r* variants in mammals (Robbins *et al.* 1993; Klungland *et al.* 1995; Newton *et al.* 2000; Beaumont *et al.* 2008; Fontanesi *et al.* 2009; Brockerville *et al.* 2013; Zhang *et al.* 2014; Dürig *et al.* 2018), but only a single presumptive null allele is found among the dozens of causative *Mc1r* variants reported in birds: Trp32Ter causes the melanic black-winged bronze (*b<sup>l</sup>*) trait of turkeys, which is also unusual among darkening *Mc1r* traits in that it, like *sy*, is recessive to wild-type (Vidal *et al.* 2010a). Another recessive avian *Mc1r* darkening variant is the Phe256del allele of melanic royal purple (*m*) guineafowl, the consequences of which for protein function are unknown, but could represent a partial, conditional, or complete loss of function (Vidal *et al.* 2010b). Interestingly, these three recessive darkeners each cause the elimination of

small whitish secondary pattern elements occupying parts of individual feathers: the albescent lateral tail strip of smoky pigeons, the light wing bars of black-winged bronze turkeys, and the pearl spots of royal purple guineafowl. Although a requirement for *Mc1r* in the development of some unpigmented regions may seem counterintuitive based on its G protein-mediated cAMP signaling activity, it is consistent with the finding that the whitish spots in developing feathers of guineafowl and some other birds contain unpigmented melanocytes maintained in an undifferentiated state by Agouti signaling protein (ASIP), an inverse-agonist of *Mc1r* (Lin *et al.* 2013). In addition to its well-known function to repress cAMP-stimulated eumelanin synthesis driven by *Mc1r* agonist binding, ASIP also inhibits murine melanocyte differentiation and proliferation via the Attractin/Mahogunin signaling pathway in a manner independent of cAMP second messenger signaling, but still dependent on high-affinity binding to *Mc1r* to support low-affinity interactions of ASIP with *Mc1r*-associated Attractin (He *et al.* 2001; Hida *et al.* 2009). We speculate that disruption of *Mc1r*-scaffolded cAMP-independent signaling by ASIP may be responsible for the loss of near-white secondary pattern elements in the smoky pigeon tail, black-winged bronze turkey wing, and royal purple guineafowl dorsum, and also note that the potential for some mutations to preferentially impact either G protein signaling or ASIP-Attractin scaffolding functions of *Mc1r* might account for some of the phenotypic variety of *Mc1r*-linked traits in birds, most notably gyrfalcons, barn owls, and chickens (Kerje *et al.* 2003; Johnson *et al.* 2012; San-Jose *et al.* 2017).

Since *Mc1r* null mutations eliminate dark eumelanic coat pigmentation in mammals, we were surprised to find the black bars of the pigeon wing and tail only slightly perturbed in *Mc1r*<sup>*Δ500fs*</sup> homozygotes, indicating that the signals governing their expression are transduced largely independently of *Mc1r*. This apparent divergence from mammalian pigment pattern

regulation contrasts markedly with the similarity of the phenotypic effects in pigeons of mutations in downstream melanogenesis genes responsible for the four major types of human oculocutaneous albinism (see companion paper), indicating that melanogenesis pathway endpoints are not radically different between the taxa. The resilience of some, but not all melanin-based pattern features to the *Mc1r* alleles reported here suggests that “pathway” is no longer an appropriate term for avian pigmentary regulation, and “network” is a more apt descriptor. The identity of one such parallel regulatory network node is suggested by the recent identification of *NDP* as the pigeon *c* locus, responsible for *barless* and *Checker* traits affecting only the wing bars (Vickrey *et al.* 2018). It should not come as a surprise that a more elaborate melanogenesis regulatory apparatus might be employed to decorate feathers than hairs, given the greater potential offered by a two-dimensional canvas (Mundy 2005; Lin *et al.* 2013); however, conserved roles for parallel regulatory nodes in mammalian coat patterning may yet exist.

### ***Mc1r's role in pigment type-switching***

Plumage color patterns formed by changes in pheomelanin-eumelanin proportions are common in birds and thought to be regulated by *Mc1r* and its ligands, as is the case for mammalian pelage (Yoshihara *et al.* 2012; Lin *et al.* 2013; Gluckman and Mundy 2017). Yet while some alleles may enhance pheomelanism in red genetic backgrounds, such as *recessive red* pigeons or wild-type red jungle fowl, no avian *Mc1r* variant identified thus far manifests the ability to independently affect wholesale switching of wild-type eumelanic plumage to the uniform red/yellow pigmentation typical of *Mc1r* null alleles in mammals (Mundy 2005; Boswell and Takeuchi 2005). That the iconic alternating pheomelanin-eumelanin bands of turkey tails are retained in black-winged bronze turkeys should serve as a high-visibility warning of something

amiss with the conventional wisdom; however, the significance of this important finding has gone largely unnoticed, possibly discounted due to its uniqueness or the potential for post-transcriptional rescue (Vidal *et al.* 2010a). The identification here of a clearly inactivating, yet phenotypically mild, darkening disruption of *Mc1r* in pigeons affirms that the similarly mild, darkening *Mc1r* nonsense variant in black-winged bronze turkeys isn't a red herring, and the possibility must be considered that the biological context of *Mc1r* in plumage pigmentation may deny it the capacity to independently spawn the types of uniform pheomelanin effects of the classical *extension (e)* locus *Mc1r* mutants of mammals (Kerje *et al.* 2003; Mundy 2005; Vidal *et al.* 2010a). The pigeon *recessive red* trait was symbolized *e* because it was expected to be homologous to mammalian *e* locus mutants (Metzelaar 1926), but mapping two pigeon *e* mutations to *cis*-regulatory element deletions in *Sox10*, a target of *Mc1r* signaling activity, demonstrated that this pheomelanizing capacity resides downstream of *Mc1r* in pigeons (Domyan *et al.* 2014). Perhaps *Mc1r* is not the fulcrum upon which pheomelanin-eumelanin switching hinges for feathers to the extent that it is for hairs. Far from a radical proposition, such a difference might entail little more than incremental shifts in baseline activity of downstream feather melanogenesis components to favor the synthesis of eumelanin over pheomelanin at any level of cAMP stimulation, rather than only at elevated levels as in mammals (Barsh 2006).

### ***Genetic symbols***

Our findings call for some genetic symbol revision. In keeping with conventions for pigeons, we retain Bol's earlier *V* and suggest *v<sup>sv</sup>* for the *smoky* allele of the *Dirty* locus in recognition of its newfound allelism to *V* and Bol's priority (Bol 1926; Hollander 1937, 1938). The different genetic backgrounds of the families in which the *Dirty* alleles examined here



segregated precluded meaningful assessment of potential differences in their phenotypic effects, so we will distinguish their symbols only by superscripted numerals. Since offspring from Family1 were unavailable for breeding tests, the association of the Gly174 variant with  $V$  must be considered somewhat tentative, as without such tests we cannot exclude the possibility that the melanism of non-smoky individuals in this family was influenced by background factors hypostatic to *smoky*. We propose symbolizing the Gly174 variant as  $V^1$  in recognition of its prior preliminary association with *Dirty* by Smith and colleagues, and the Met85 variant as  $V^2$ .

Our results should prompt reexamination of additional *Mc1r* variants from previous surveys in pigeons and other birds for associations with relatively mild phenotypes that may have been overlooked. More importantly, these findings offer new insights into plumage pigmentation regulation, and identify powerful new tools for the genetic dissection of pigeon pigimentary variation that can be leveraged to identify and characterize additional components of the avian melanogenesis regulatory apparatus.

## **Acknowledgments**

Thanks to John Fondon, and thanks to lab members for assistance with animal care and sample collection. This work was supported by institutional funding from UT Arlington (to J.W.F.). Numerous discussions about pigeon trait diagnosis with expert breeders and genetics enthusiasts, including Kerry Hendricks, Joel Kinkade, Amy Klopman, Nicholas Fontenot, Michael Bordelon, and David Rinehart, were invaluable in guiding this research. We would also like to Dan Smith at Goshen College for sharing his unpublished results with us, and for helpful discussions.

## Literature Cited

- Araguas R. M., N. Sanz, J. Viñas, and O. Vidal, 2018 MC1R polymorphism associated with plumage color variations in *Coturnix chinensis*. *Anim. Genet.* in press. <https://doi.org/10.1111/age.12679>
- Baião P. C., E. A. Schreiber, and P. G. Parker, 2007 The genetic basis of the plumage polymorphism in red-footed boobies (*Sula sula*): a Melanocortin-1 receptor (MC1R) analysis. *J. Hered.* 98: 287–292. <https://doi.org/10.1093/jhered/esm030>
- Barsh G. S., 2006 Regulation of pigment type switching by agouti, melanocortin signaling, attractin, and mahoganoid, pp. 395–409 in *The pigmentary system: physiology and pathophysiology*, Blackwell Publishing, Massachusetts.
- Beaumont K. A., S. N. Shekar, A. L. Cook, D. L. Duffy, and R. A. Sturm, 2008 Red hair is the null phenotype of MC1R. *Hum. Mutat.* 29: E88–E94. <https://doi.org/10.1002/humu.20788>
- Benson G., 1999 Tandem repeats finder: a program to analyze DNA sequences. *Nucleic Acids Res.* 27: 573–580. <https://doi.org/10.1093/nar/27.2.573>
- Bol C. J. A., 1926 Genetische analyse van kleuren, veerpatronen, tinten en afteekeningen bij postduiven. *Genetica* 8: 45–154. <https://doi.org/10.1007/BF01481820>
- Boswell T., and S. Takeuchi, 2005 Recent developments in our understanding of the avian melanocortin system: Its involvement in the regulation of pigmentation and energy homeostasis. *Peptides* 26: 1733–1743. <https://doi.org/10.1016/j.peptides.2004.11.039>
- Brockerville R. M., M. J. McGrath, B. L. Pilgrim, and H. D. Marshall, 2013 Sequence analysis of three pigmentation genes in the Newfoundland population of *Canis latrans* links the Golden Retriever

Mc1r variant to white coat color in coyotes. *Mamm. Genome* 24: 134–141.

<https://doi.org/10.1007/s00335-012-9443-x>

Cheviron Z. A., S. J. Hackett, and R. T. Brumfield, 2006 Sequence variation in the coding region of the melanocortin-1 receptor gene (MC1R) is not associated with plumage variation in the blue-crowned manakin (*Lepidothrix coronata*). *Proc. R. Soc. Lond. B Biol. Sci.* 273: 1613–1618. <https://doi.org/10.1098/rspb.2006.3499>

Cibois A., J.-C. Thibault, and E. Pasquet, 2012 The molecular basis of the plumage colour polymorphism in the Tahiti reed-warbler *Acrocephalus caffer*. *J. Avian Biol.* 43: 3–8.

<https://doi.org/10.1111/j.1600-048X.2011.05546.x>

Cieslak M., M. Reissmann, M. Hofreiter, and A. Ludwig, 2011 Colours of domestication. *Biol. Rev.* 86: 885–899. <https://doi.org/10.1111/j.1469-185X.2011.00177.x>

Derelle R., F. A. Kondrashov, V. Y. Arkhipov, H. Corbel, A. Frantz, *et al.*, 2013 Color differences among feral pigeons (*Columba livia*) are not attributable to sequence variation in the coding region of the melanocortin-1 receptor gene (MC1R). *BMC Res. Notes* 6: 310.

<https://doi.org/10.1186/1756-0500-6-310>

Domyan E. T., M. W. Guernsey, Z. Kronenberg, S. Krishnan, R. E. Boissy, *et al.*, 2014 Epistatic and combinatorial effects of pigmentary gene mutations in the domestic pigeon. *Curr. Biol.* 24: 459–464. <https://doi.org/10.1016/j.cub.2014.01.020>

Doucet S. M., M. D. Shawkey, M. K. Rathburn, H. L. Mays, and R. Montgomerie, 2004 Concordant evolution of plumage colour, feather microstructure and a melanocortin receptor gene between

mainland and island populations of a fairy-wren. *Proc. R. Soc. Lond. B Biol. Sci.* 271: 1663–1670.

<https://doi.org/10.1098/rspb.2004.2779>

Dürig N., A. Letko, V. Lepori, S. H. Rasouliha, R. Loechel, *et al.*, 2018 Two MC1R loss-of-function alleles in cream-coloured Australian Cattle Dogs and white Huskies. *Anim. Genet.* 49: 284–290.

<https://doi.org/10.1111/age.12660>

Eizirik E., N. Yuhki, W. E. Johnson, M. Menotti-Raymond, S. S. Hannah, *et al.*, 2003 Molecular genetics and evolution of melanism in the cat family. *Curr. Biol.* 13: 448–453.

[https://doi.org/10.1016/S0960-9822\(03\)00128-3](https://doi.org/10.1016/S0960-9822(03)00128-3)

Estabrook F., 2013 *Dirty, Sooty, Smoky*. *Purebred Pigeon* 53: 62–64.

Everts R. E., J. Rothuizen, and B. A. van Oost, 2000 Identification of a premature stop codon in the melanocyte-stimulating hormone receptor gene (MC1R) in Labrador and Golden retrievers with yellow coat colour. *Anim. Genet.* 31: 194–199. <https://doi.org/10.1046/j.1365-2052.2000.00639.x>

Fang M., G. Larson, H. S. Ribeiro, N. Li, and L. Andersson, 2009 Contrasting mode of evolution at a coat color locus in wild and domestic pigs. *PLoS Genet.* 5: e1000341.

<https://doi.org/10.1371/journal.pgen.1000341>

Fondon 3rd J. W., A. Martin, S. Richards, R. A. Gibbs, and D. Mittelman, 2012 Analysis of microsatellite variation in *Drosophila melanogaster* with population-scale genome sequencing. *PLoS ONE* 7:

e33036. <https://doi.org/10.1371/journal.pone.0033036>

Fontanesi L., F. Beretti, V. Riggio, S. Dall’Olio, E. G. González, *et al.*, 2009 Missense and nonsense mutations in melanocortin 1 receptor (MC1R) gene of different goat breeds: association with red

and black coat colour phenotypes but with unexpected evidences. *BMC Genet.* 10: 47.

<https://doi.org/10.1186/1471-2156-10-47>

Fontanesi L., F. Beretti, V. Riggio, S. Dall’Olio, D. Calascibetta, *et al.*, 2010 Sequence characterization of the melanocortin 1 receptor (MC1R) gene in sheep with different coat colours and identification of the putative e allele at the ovine Extension locus. *Small Rumin. Res.* 91: 200–207.

<https://doi.org/10.1016/j.smallrumres.2010.03.015>

Gangoso L., J. M. Grande, A.-L. Ducrest, J. Figuerola, G. R. Bortolotti, *et al.*, 2011 MC1R-dependent, melanin-based colour polymorphism is associated with cell-mediated response in the Eleonora’s falcon. *J. Evol. Biol.* 24: 2055–2063. <https://doi.org/10.1111/j.1420-9101.2011.02336.x>

Gluckman T.-L., and N. I. Mundy, 2017 The differential expression of MC1R regulators in dorsal and ventral quail plumages during embryogenesis: Implications for plumage pattern formation, (R. W. Dettman, Ed.). *PLoS ONE* 12: e0174714. <https://doi.org/10.1371/journal.pone.0174714>

Gross J. B., J. Weagley, B. A. Stahl, L. Ma, L. Espinasa, *et al.*, 2017 A local duplication of the Melanocortin receptor 1 locus in *Astyanax*. *Genome* 61: 254–265.

Guernsey M. W., L. Ritscher, M. A. Miller, D. A. Smith, T. Schöneberg, *et al.*, 2013 A Val85Met mutation in Melanocortin-1 Receptor is associated with reductions in eumelanic pigmentation and cell surface expression in domestic rock pigeons (*Columba livia*), (D. Caramelli, Ed.). *PLoS ONE* 8: e74475. <https://doi.org/10.1371/journal.pone.0074475>

Hall T. A., 1999 BioEdit: a user-friendly biological sequence alignment editor and analysis program for Windows 95/98/NT, pp. 95–98 in *Nucleic acids symposium series*, [London]: Information Retrieval Ltd., c1979-c2000.

He L., T. M. Gunn, D. M. Bouley, X.-Y. Lu, S. J. Watson, *et al.*, 2001 A biochemical function for attractin in agouti-induced pigmentation and obesity. *Nat. Genet.* 27: 40–47. <https://doi.org/10.1038/83741>

Hida T., K. Wakamatsu, E. V. Sviderskaya, A. J. Donkin, L. Montoliu, *et al.*, 2009 Agouti protein, mahogunin, and attractin in pheomelanogenesis and melanoblast-like alteration of melanocytes: a cAMP-independent pathway. *Pigment Cell Melanoma Res.* 22: 623–634. <https://doi.org/10.1111/j.1755-148X.2009.00582.x>

Hollander W. F., 1937 *Hereditary interrelationships of certain factors in pigeons. Dissertation.* Department of Genetics, University of Wisconsin–Madison.

Hollander W. F., 1938 Inheritance of blue-black patterns and bleached in pigeon. *Genetics* 23: 12–23.

Hollander W. F., 1983 *Origins and Excursions in Pigeon Genetics: A Compilation.* The Ink Spot.

Janssen K., and N. I. Mundy, 2017 The genetic basis and enigmatic origin of melanic polymorphism in pomarine skuas (*Stercorarius pomarinus*). *Proc R Soc B* 284: 20171735. <https://doi.org/10.1098/rspb.2017.1735>

Johnson J. A., A. D. Ambers, and K. K. Burnham, 2012 Genetics of plumage color in the gyrfalcon (*Falco rusticolus*): analysis of the melanocortin-1 receptor gene. *J. Hered.* 103: 315–321. <https://doi.org/10.1093/jhered/ess023>

Johnston R. F., and M. Janiga, 1995 *Feral Pigeons.* Oxford University Press, New York.

Kaelin C. B., and G. S. Barsh, 2013 Genetics of pigmentation in dogs and cats. *Annu. Rev. Anim. Biosci.* 1: 125–156. <https://doi.org/10.1146/annurev-animal-031412-103659>

Kageyama M., A. Takenouchi, K. Kinoshita, Y. Nakamura, and M. Tsudzuki, 2018 The “extended brown” plumage color mutant of blue-breasted quail (*Coturnix chinensis*) is associated with a mutation in the Melanocortin 1-Receptor gene (MC1R). *J. Poult. Sci.* 0180006.

Kerje S., J. Lind, K. Schütz, P. Jensen, and L. Andersson, 2003 Melanocortin 1-receptor (MC1R) mutations are associated with plumage colour in chicken. *Anim. Genet.* 34: 241–248.  
<https://doi.org/10.1046/j.1365-2052.2003.00991.x>

Kijas J. M. H., R. Wales, A. Törnsten, P. Chardon, M. Moller, *et al.*, 1998 Melanocortin receptor 1 (MC1R) mutations and coat color in pigs. *Genetics* 150: 1177–1185.

Klungland H., D. I. Vage, L. Gomez-Raya, S. Adalsteinsson, and S. Lien, 1995 The role of melanocyte-stimulating hormone (MSH) receptor in bovine coat color determination. *Mamm. Genome* 6: 636–639. <https://doi.org/10.1007/BF00352371>

Levi W. M., 1963 *The pigeon*. Levi Publishing Co., Sumter, South Carolina.

Levi W. M., 1965 *Encyclopedia of pigeon breeds*. Levi Publishing Co., Sumter, South Carolina.

Li H., B. Handsaker, A. Wysoker, T. Fennell, J. Ruan, *et al.*, 2009 The Sequence Alignment/Map format and SAMtools. *Bioinformatics* 25: 2078–2079. <https://doi.org/10.1093/bioinformatics/btp352>

Lieber M. R., Y. Ma, U. Pannicke, and K. Schwarz, 2003 Mechanism and regulation of human non-homologous DNA end-joining. *Nat. Rev. Mol. Cell Biol.* 4: 712–720.  
<https://doi.org/10.1038/nrm1202>

Lin S. J., J. Foley, T. X. Jiang, C. Y. Yeh, P. Wu, *et al.*, 2013 Topology of feather melanocyte progenitor niche allows complex pigment patterns to emerge. *Science* 340: 1442–1445.  
<https://doi.org/10.1126/science.1230374>

- Ling M. K., M. C. Lagerström, R. Fredriksson, R. Okimoto, N. I. Mundy, *et al.*, 2003 Association of feather colour with constitutively active melanocortin 1 receptors in chicken. *Eur. J. Biochem.* 270: 1441–1449. <https://doi.org/10.1046/j.1432-1033.2003.03506.x>
- MacDougall-Shackleton E. A., L. Blanchard, and H. L. Gibbs, 2003 Unmelanized plumage patterns in old world leaf warblers do not correspond to sequence variation at melanocortin-1 receptor locus (MC1R). *Mol. Biol. Evol.* 20: 1675–1681. <https://doi.org/10.1093/molbev/msg186>
- Mangile R. J., 1973 What do we know about the ‘Dirty’ coloration? *Pigeon Genet. Newsl.* 67: 27–29.
- Metzelaar J., 1926 *Color breeding in pigeon plumage*. American Pigeon Keeper Co., Geneva, Illinois.
- Miller M. A., and M. D. Shapiro, 2011 Mc1r does not play a major role in pigmentation variation among domestic pigeons, pp. E228–E228 in *Integrative and Comparative Biology*, Oxford University Press, Cary, NC.
- Morgan T. H., 1918 Inheritance of number of feathers of the fantail pigeon. *Am. Nat.* 52: 5–27.
- Mundy N. I., N. S. Badcock, T. Hart, K. Scribner, K. Janssen, *et al.*, 2004 Conserved genetic basis of a quantitative plumage trait involved in mate choice. *Science* 303: 1870–1873. <https://doi.org/10.1126/science.1093834>
- Mundy N. I., 2005 A window on the genetics of evolution: MC1R and plumage colouration in birds. *Proc. R. Soc. B Biol. Sci.* 272: 1633–1640. <https://doi.org/10.1098/rspb.2005.3107>
- Nachman M. W., H. E. Hoekstra, and S. L. D’Agostino, 2003 The genetic basis of adaptive melanism in pocket mice. *Proc. Natl. Acad. Sci.* 100: 5268–5273. <https://doi.org/10.1073/pnas.0431157100>



Nadeau N. J., F. Minvielle, and N. I. Mundy, 2006 Association of a Glu92Lys substitution in MC1R with extended brown in Japanese quail (*Coturnix japonica*). *Anim. Genet.* 37: 287–289.

<https://doi.org/10.1111/j.1365-2052.2006.01442.x>

Newton J. M., A. L. Wilkie, L. He, S. A. Jordan, D. L. Metallinos, *et al.*, 2000 Melanocortin 1 receptor variation in the domestic dog. *Mamm. Genome* 11: 24–30.

<https://doi.org/10.1007/s003350010005>

Ran J.-S., X.-Y. You, J. Jin, Y.-G. Zhou, Y. Wang, *et al.*, 2016 The relationship between MC1R mutation and plumage color variation in pigeons. *BioMed Res. Int.* 2016: 1–6.

<https://doi.org/10.1155/2016/3059756>

Ritland K., C. Newton, and H. D. Marshall, 2001 Inheritance and population structure of the white-phased “Kermode” black bear. *Curr. Biol.* 11: 1468–1472. [https://doi.org/10.1016/S0960-9822\(01\)00448-1](https://doi.org/10.1016/S0960-9822(01)00448-1)

Robbins L. S., J. H. Nadeau, K. R. Johnson, M. A. Kelly, L. Roselli-Reh fuss, *et al.*, 1993 Pigmentation phenotypes of variant extension locus alleles result from point mutations that alter MSH receptor function. *Cell* 72: 827–834. [https://doi.org/10.1016/0092-8674\(93\)90572-8](https://doi.org/10.1016/0092-8674(93)90572-8)

Rosenbaum D. M., S. G. Rasmussen, and B. K. Kobilka, 2009 The structure and function of G-protein-coupled receptors. *Nature* 459: 356–363.

Roulin A., and A.-L. Ducrest, 2013 Genetics of colouration in birds. *Semin. Cell Dev. Biol.* 24: 594–608.

<https://doi.org/10.1016/j.semcd.2013.05.005>

Rozen S., and H. Skaletsky, 2000 Primer3 on the WWW for general users and for biologist programmers.

*Methods Mol. Biol.* Clifton NJ 132: 365–386.

Sambrook J., and D. W. Russell, 2006 Purification of nucleic acids by extraction with phenol:chloroform.

CSH Protoc. 2006. <https://doi.org/10.1101/pdb.prot4455>

San-Jose L. M., A.-L. Ducrest, V. Ducret, C. Simon, H. Richter, *et al.*, 2017 MC1R variants affect the expression of melanocortin and melanogenic genes and the association between melanocortin genes and coloration. *Mol. Ecol.* 26: 259–276. <https://doi.org/10.1111/mec.13861>

Schiöth H. B., S. R. Phillips, R. Rudzish, M. A. Birch-Machin, J. E. S. Wikberg, *et al.*, 1999 Loss of function mutations of the human Melanocortin 1 receptor are common and are associated with red hair. *Biochem. Biophys. Res. Commun.* 260: 488–491. <https://doi.org/10.1006/bbrc.1999.0935>

Schmitt C. J., 2015 Pre-industrial melanism: the origin, maintenance, and genetic basis of an urban melanic morph of the vermilion flycatcher. Thesis. Dep. Biol. Univ. N. M.

Schmutz S. M., T. G. Berryere, and A. D. Goldfinch, 2002 TYRP1 and MC1R genotypes and their effects on coat color in dogs. *Mamm. Genome* 13: 380–387. <https://doi.org/10.1007/s00335-001-2147-2>

Sell A., 2012 *Pigeon Genetics: Applied Genetics in the Domestic Pigeon*. Verlag Karin und A. Sell, Achim, Germany.

Shapiro M. D., Z. Kronenberg, C. Li, E. T. Domyan, H. Pan, *et al.*, 2013 Genomic diversity and evolution of the head crest in the rock pigeon. *Science* 339: 1063–1067. <https://doi.org/10.1126/science.1230422>

Takeuchi S., H. Suzuki, M. Yabuuchi, and S. Takahashi, 1998 A possible involvement of melanocortin 1-receptor in regulating feather color pigmentation in the chicken. *Biochim. Biophys. Acta BBA - Gene Struct. Expr.* 1308: 164–168. [https://doi.org/10.1016/0167-4781\(96\)00100-5](https://doi.org/10.1016/0167-4781(96)00100-5)

Theron E., K. Hawkins, E. Bermingham, R. E. Ricklefs, and N. I. Mundy, 2001 The molecular basis of an avian plumage polymorphism in the wild: A melanocortin-1-receptor point mutation is perfectly associated with the melanic plumage morph of the bananaquit, *Coereba flaveola*. *Curr. Biol.* 11: 550–557. [https://doi.org/10.1016/S0960-9822\(01\)00158-0](https://doi.org/10.1016/S0960-9822(01)00158-0)

Uy J. A. C., R. G. Moyle, C. E. Filardi, and Z. A. Cheviron, 2009 Difference in plumage color used in species recognition between incipient species is linked to a single amino acid substitution in the melanocortin-1 receptor. *Am. Nat.* 174: 244–254.

Våge D. I., D. Lu, H. Klungland, S. Lien, S. Adalsteinsson, *et al.*, 1997 A non-epistatic interaction of agouti and extension in the fox, *Vulpes vulpes*. *Nat. Genet.* 15: 311–315.  
<https://doi.org/10.1038/ng0397-311>

Våge D. I., H. Klungland, D. Lu, and R. D. Cone, 1999 Molecular and pharmacological characterization of dominant black coat color in sheep. *Mamm. Genome* 10: 39–43.  
<https://doi.org/10.1007/s003359900939>

Vickrey A. I., R. Bruders, Z. Kronenberg, E. Mackey, R. J. Bohlender, *et al.*, 2018 Introgression of regulatory alleles and a missense coding mutation drive plumage pattern diversity in the rock pigeon. *eLife* 7: e34803. <https://doi.org/10.7554/eLife.34803>

Vidal O., J. Viñas, and C. Pla, 2010a Variability of the melanocortin 1 receptor (MC1R) gene explains the segregation of the bronze locus in turkey (*Meleagris gallopavo*). *Poult. Sci.* 89: 1599–1602.  
<https://doi.org/10.3382/ps.2010-00726>

Vidal O., R. M. Araguas, R. Fernández, S. Heras, N. Sanz, *et al.*, 2010b Melanism in guinea fowl (*Numida meleagris*) is associated with a deletion of Phenylalanine-256 in the MC1R gene. *Anim. Genet.* 41: 656–658. <https://doi.org/10.1111/j.1365-2052.2010.02056.x>

Walker W. P., and T. M. Gunn, 2010 Piecing together the pigment-type switching puzzle. *Pigment Cell Melanoma Res.* 23: 4–6. <https://doi.org/10.1111/j.1755-148X.2009.00654.x>

Wigginton J. E., D. J. Cutler, and G. R. Abecasis, 2005 A note on exact tests of Hardy-Weinberg equilibrium. *Am. J. Hum. Genet.* 76: 887–893. <https://doi.org/10.1086/429864>

Wlasiuk G., and M. W. Nachman, 2007 The genetics of adaptive coat color in gophers: Coding variation at *Mc1r* is not responsible for dorsal color differences. *J. Hered.* 98: 567–574. <https://doi.org/10.1093/jhered/esm059>

Yang Y., 2011 Structure, function and regulation of the melanocortin receptors. *Eur. J. Pharmacol.* 660: 125–130. <https://doi.org/10.1016/j.ejphar.2010.12.020>

Yoshihara C., A. Fukao, K. Ando, Y. Tashiro, S. Taniuchi, *et al.*, 2012 Elaborate color patterns of individual chicken feathers may be formed by the agouti signaling protein. *Gen. Comp. Endocrinol.* 175: 495–499. <https://doi.org/10.1016/j.ygcen.2011.12.009>

Yu W., C. Wang, Q. Xin, S. Li, Y. Feng, *et al.*, 2013 Non-synonymous SNPs in MC1R gene are associated with the extended black variant in domestic ducks (*Anas platyrhynchos*). *Anim. Genet.* 44: 214–216. <https://doi.org/10.1111/j.1365-2052.2012.02377.x>

Zhang M.-Q., X. Xu, and S.-J. Luo, 2014 The genetics of brown coat color and white spotting in domestic yaks (*Bos grunniens*). *Anim. Genet.* 45: 652–659. <https://doi.org/10.1111/age.12191>
